# Supplementary material
Source: publisher figshare collection journal article supplement (https://rs.figshare.com/ndownloader/files/13329656)
Supplement: Supplementary file 1 [file 13329656]

**Supplementary Material**

**Modelling determinants of extinction across two Mesozoic hyperthermal events**

Alexander M. Dunhill1, William J. Foster2, Sandro Azaele3, James Sciberras4 and Richard J. Twitchett5

1School of Earth and Environment, University of Leeds, Leeds LS2 9JT, UK

2Museum für Naturkunde, Leibniz-Institut für Evolutions- und Biodiversitätsforschung, Berlin, Deutschland3School of Mathematics, University of Leeds, Leeds LS2 9JT, UK

4Department of Biology and Biochemistry, University of Bath, Claverton Down, BA2 7AY, UK

5Department of Earth Sciences, Natural History Museum, London, SW7 5BD, UK

Author for correspondence: Alexander M. Dunhill

e-mail: [a.dunhill@leeds.ac.uk](mailto:a.dunhill@leeds.ac.uk)

**Supplementary methods**

| Table S1: List of variables in each GLM. “no env” refers to models run without depositional environmental setting data which is only present for around 50% of the data set. Therefore, the removal of the depositional environmental setting doubles the sample size. | |
| --- | --- |
| Model | Determinants |
| all | motility; tiering; feeding; calcification; latitude; palaeoocean basin; depositional setting |
| all no env | motility; tiering; feeding; calcification; latitude; palaeoocean basin |
| extrinsic | latitude; palaeoocean basin; depositional setting |
| extrinsic no env | latitude; palaeoocean basin |
| intrinsic | motility; tiering; feeding; calcification |
| intrinsic no env | motility; tiering; feeding; calcification |

**Supplementary results**

**GLM outputs**

**LTE**

**Model = all**

> GLM_LTE_A1ii <- glm(extinction ~ fMOTILITY + fTIERING + fFEEDING +

+ fLATITUDE + fBASIN + fENVIRONMENT +

+ fCALCIFICATION,

+ family = quasibinomial, data = LTE)

> summary(GLM_LTE_A1ii)

Call:

glm(formula = extinction ~ fMOTILITY + fTIERING + fFEEDING +

fLATITUDE + fBASIN + fENVIRONMENT + fCALCIFICATION, family = quasibinomial,

data = LTE)

Deviance Residuals:

Min 1Q Median 3Q Max

-0.52039 -0.07450 0.00003 0.15316 0.55019

Coefficients: (1 not defined because of singularities)

Estimate Std. Error t value Pr(>|t|)

(Intercept) 2.6340 1.5901 1.656 0.1320

fMOTILITYnonmotile -0.6121 0.7194 -0.851 0.4170

fTIERINGinfaunal -1.0261 0.6461 -1.588 0.1468

fTIERINGpelagic -2.2947 1.8030 -1.273 0.2350

fFEEDINGphotosymbiotic 1.6102 2.0644 0.780 0.4554

fFEEDINGpredatory NA NA NA NA

fFEEDINGsuspension 0.7476 0.8971 0.833 0.4262

fLATITUDET 2.9924 1.1182 2.676 0.0254 *

fBASINTethys -0.9580 0.9703 -0.987 0.3493

fENVIRONMENTOffshore 1.1036 0.7170 1.539 0.1581

fENVIRONMENTReef 16.1132 3723.9890 0.004 0.9966

fCALCIFICATIONmoderate -1.7223 1.0296 -1.673 0.1287

---

Signif. codes: 0 ‘***’ 0.001 ‘**’ 0.01 ‘*’ 0.05 ‘.’ 0.1 ‘ ’ 1

(Dispersion parameter for quasibinomial family taken to be 0.1443989)

Null deviance: 6.1229 on 19 degrees of freedom

Residual deviance: 1.3575 on 9 degrees of freedom

AIC: NA

Number of Fisher Scoring iterations: 19

> # find best model

>

> drop1(GLM_LTE_A1ii, test = "F")

Single term deletions

Model:

extinction ~ fMOTILITY + fTIERING + fFEEDING + fLATITUDE + fBASIN +

fENVIRONMENT + fCALCIFICATION

Df Deviance F value Pr(>F)

<none> 1.3576

fMOTILITY 1 1.4633 0.7010 0.424115

fTIERING 1 1.7343 2.4975 0.148485

fFEEDING 2 1.4873 0.4300 0.663196

fLATITUDE 1 3.1510 11.8898 0.007296 **

fBASIN 1 1.5097 1.0090 0.341381

fENVIRONMENT 2 1.7986 1.4619 0.281992

fCALCIFICATION 1 1.8601 3.3320 0.101236

---

Signif. codes: 0 ‘***’ 0.001 ‘**’ 0.01 ‘*’ 0.05 ‘.’ 0.1 ‘ ’ 1

>

> # best model

>

> GLM_LTE_A1iii <- glm(extinction ~ fLATITUDE,

+ family = quasibinomial, data = LTE)

>

> summary(GLM_LTE_A1iii)

Call:

glm(formula = extinction ~ fLATITUDE, family = quasibinomial,

data = LTE)

Deviance Residuals:

Min 1Q Median 3Q Max

-0.79806 -0.18099 0.08947 0.30075 0.81341

Coefficients:

Estimate Std. Error t value Pr(>|t|)

(Intercept) 0.9362 0.2806 3.336 0.00367 **

fLATITUDET 2.1372 0.8825 2.422 0.02623 *

---

Signif. codes: 0 ‘***’ 0.001 ‘**’ 0.01 ‘*’ 0.05 ‘.’ 0.1 ‘ ’ 1

(Dispersion parameter for quasibinomial family taken to be 0.207126)

Null deviance: 6.1229 on 19 degrees of freedom

Residual deviance: 4.1803 on 18 degrees of freedom

AIC: NA

Number of Fisher Scoring iterations: 6

**Model = all no env**

> GLM_LTE_B1ii <- glm(extinction ~ fMOTILITY + fTIERING + fFEEDING +

+ fLATITUDE + fBASIN + fCALCIFICATION,

+ family = quasibinomial, data = LTE)

> summary(GLM_LTE_B1ii)

Call:

glm(formula = extinction ~ fMOTILITY + fTIERING + fFEEDING +

fLATITUDE + fBASIN + fCALCIFICATION, family = quasibinomial,

data = LTE)

Deviance Residuals:

Min 1Q Median 3Q Max

-0.9482 -0.1619 0.1085 0.2678 0.7364

Coefficients:

Estimate Std. Error t value Pr(>|t|)

(Intercept) 3.30683 1.90023 1.740 0.0965 .

fMOTILITYnonmotile -0.16350 0.48100 -0.340 0.7373

fTIERINGinfaunal 0.04299 0.51878 0.083 0.9347

fTIERINGpelagic -0.97680 1.26559 -0.772 0.4488

fFEEDINGgrazing -1.00009 1.39971 -0.715 0.4828

fFEEDINGphotosymbiotic 2.28581 1.50753 1.516 0.1444

fFEEDINGpredatory 3.24156 1.46390 2.214 0.0380 *

fFEEDINGsuspension 0.80595 0.79223 1.017 0.3206

fLATITUDEP -1.15779 1.14155 -1.014 0.3220

fLATITUDET 0.77683 0.48202 1.612 0.1220

fBASINPanthalassa -2.38603 1.34792 -1.770 0.0912 .

fBASINTethys -2.87926 1.46745 -1.962 0.0631 .

fCALCIFICATIONlight -1.79362 1.26434 -1.419 0.1707

fCALCIFICATIONmoderate -1.03692 0.65945 -1.572 0.1308

---

Signif. codes: 0 ‘***’ 0.001 ‘**’ 0.01 ‘*’ 0.05 ‘.’ 0.1 ‘ ’ 1

(Dispersion parameter for quasibinomial family taken to be 0.2016485)

Null deviance: 11.300 on 34 degrees of freedom

Residual deviance: 4.467 on 21 degrees of freedom

AIC: NA

Number of Fisher Scoring iterations: 6

>

> # find best model

>

> drop1(GLM_LTE_B1ii, test = "F")

Single term deletions

Model:

extinction ~ fMOTILITY + fTIERING + fFEEDING + fLATITUDE + fBASIN +

fCALCIFICATION

Df Deviance F value Pr(>F)

<none> 4.4670

fMOTILITY 1 4.4904 0.1099 0.74358

fTIERING 2 4.6018 0.3168 0.73189

fFEEDING 4 6.8103 2.7541 0.05507 .

fLATITUDE 2 5.2620 1.8687 0.17909

fBASIN 2 5.2717 1.8916 0.17566

fCALCIFICATION 2 5.1245 1.5455 0.23650

---

Signif. codes: 0 ‘***’ 0.001 ‘**’ 0.01 ‘*’ 0.05 ‘.’ 0.1 ‘ ’ 1

>

> # best model

> GLM_LTE_B1iii <- glm(extinction ~ fFEEDING,

+ family = quasibinomial, data = LTE)

>

> summary(GLM_LTE_B1iii)

Call:

glm(formula = extinction ~ fFEEDING, family = quasibinomial,

data = LTE)

Deviance Residuals:

Min 1Q Median 3Q Max

-0.94003 -0.24861 0.07654 0.30255 0.81753

Coefficients:

Estimate Std. Error t value Pr(>|t|)

(Intercept) -0.5878 0.6253 -0.940 0.35471

fFEEDINGgrazing -1.0217 1.2975 -0.787 0.43724

fFEEDINGphotosymbiotic 3.6779 1.2119 3.035 0.00494 **

fFEEDINGpredatory 2.5197 0.7893 3.192 0.00330 **

fFEEDINGsuspension 1.5121 0.6580 2.298 0.02871 *

---

Signif. codes: 0 ‘***’ 0.001 ‘**’ 0.01 ‘*’ 0.05 ‘.’ 0.1 ‘ ’ 1

(Dispersion parameter for quasibinomial family taken to be 0.1795301)

Null deviance: 11.2997 on 34 degrees of freedom

Residual deviance: 6.4135 on 30 degrees of freedom

AIC: NA

Number of Fisher Scoring iterations: 5

**Model = extrinsic**

> GLM_LTE_A3ii <- glm(extinction ~ fLATITUDE + fBASIN + fENVIRONMENT,

+ family = quasibinomial, data = LTE)

> summary(GLM_LTE_A3ii)

Call:

glm(formula = extinction ~ fLATITUDE + fBASIN + fENVIRONMENT,

family = quasibinomial, data = LTE)

Deviance Residuals:

Min 1Q Median 3Q Max

-0.7523 -0.1184 0.0339 0.3520 0.8552

Coefficients:

Estimate Std. Error t value Pr(>|t|)

(Intercept) 7.396e-01 8.197e-01 0.902 0.381

fLATITUDET 1.933e+00 9.244e-01 2.090 0.054 .

fBASINTethys 7.801e-02 8.717e-01 0.089 0.930

fENVIRONMENTOffshore 2.407e-02 5.685e-01 0.042 0.967

fENVIRONMENTReef 1.884e+01 4.216e+03 0.004 0.996

---

Signif. codes: 0 ‘***’ 0.001 ‘**’ 0.01 ‘*’ 0.05 ‘.’ 0.1 ‘ ’ 1

(Dispersion parameter for quasibinomial family taken to be 0.1914137)

Null deviance: 6.1229 on 19 degrees of freedom

Residual deviance: 3.2701 on 15 degrees of freedom

AIC: NA

Number of Fisher Scoring iterations: 19

> # find best model

>

> drop1(GLM_LTE_A3ii, test = "F")

Single term deletions

Model:

extinction ~ fLATITUDE + fBASIN + fENVIRONMENT

Df Deviance F value Pr(>F)

<none> 3.2701

fLATITUDE 1 4.3804 5.0929 0.03937 *

fBASIN 1 3.2716 0.0070 0.93446

fENVIRONMENT 2 4.0752 1.8465 0.19191

---

Signif. codes: 0 ‘***’ 0.001 ‘**’ 0.01 ‘*’ 0.05 ‘.’ 0.1 ‘ ’ 1

>

> # best model

>

> GLM_LTE_A3iii <- glm(extinction ~ fLATITUDE,

+ family = quasibinomial, data = LTE)

>

> summary(GLM_LTE_A3iii)

Call:

glm(formula = extinction ~ fLATITUDE, family = quasibinomial,

data = LTE)

Deviance Residuals:

Min 1Q Median 3Q Max

-0.79806 -0.18099 0.08947 0.30075 0.81341

Coefficients:

Estimate Std. Error t value Pr(>|t|)

(Intercept) 0.9362 0.2806 3.336 0.00367 **

fLATITUDET 2.1372 0.8825 2.422 0.02623 *

---

Signif. codes: 0 ‘***’ 0.001 ‘**’ 0.01 ‘*’ 0.05 ‘.’ 0.1 ‘ ’ 1

(Dispersion parameter for quasibinomial family taken to be 0.207126)

Null deviance: 6.1229 on 19 degrees of freedom

Residual deviance: 4.1803 on 18 degrees of freedom

AIC: NA

Number of Fisher Scoring iterations: 6

**Model = extrinsic no env**

> GLM_LTE_B3ii <- glm(extinction ~ fLATITUDE + fBASIN,

+ family = quasibinomial, data = LTE)

> summary(GLM_LTE_B3ii)

Call:

glm(formula = extinction ~ fLATITUDE + fBASIN, family = quasibinomial,

data = LTE)

Deviance Residuals:

Min 1Q Median 3Q Max

-1.41178 -0.28614 0.09095 0.42332 0.95988

Coefficients:

Estimate Std. Error t value Pr(>|t|)

(Intercept) 2.8905 1.4932 1.936 0.0624 .

fLATITUDEP -0.8110 1.1499 -0.705 0.4861

fLATITUDET 0.8358 0.4875 1.714 0.0968 .

fBASINPanthalassa -1.6740 1.4239 -1.176 0.2490

fBASINTethys -2.3546 1.5076 -1.562 0.1288

---

Signif. codes: 0 ‘***’ 0.001 ‘**’ 0.01 ‘*’ 0.05 ‘.’ 0.1 ‘ ’ 1

(Dispersion parameter for quasibinomial family taken to be 0.2688368)

Null deviance: 11.2997 on 34 degrees of freedom

Residual deviance: 9.3068 on 30 degrees of freedom

AIC: NA

Number of Fisher Scoring iterations: 5

>

> # find best model

>

> drop1(GLM_LTE_B3ii, test = "F")

Single term deletions

Model:

extinction ~ fLATITUDE + fBASIN

Df Deviance F value Pr(>F)

<none> 9.3068

fLATITUDE 2 10.3885 1.7434 0.1922

fBASIN 2 10.2198 1.4715 0.2457

>

**Model = intrinsic**

> GLM_LTE_A4ii <- glm(extinction ~ fMOTILITY + fTIERING + fFEEDING +

+ fCALCIFICATION,

+ family = quasibinomial, data = LTE)

> summary(GLM_LTE_A4ii)

Call:

glm(formula = extinction ~ fMOTILITY + fTIERING + fFEEDING +

fCALCIFICATION, family = quasibinomial, data = LTE)

Deviance Residuals:

Min 1Q Median 3Q Max

-0.71433 -0.26270 0.09925 0.32029 0.81238

Coefficients: (1 not defined because of singularities)

Estimate Std. Error t value Pr(>|t|)

(Intercept) 2.7289 1.4630 1.865 0.0849 .

fMOTILITYnonmotile -0.4503 0.8457 -0.532 0.6034

fTIERINGinfaunal -0.4901 0.7625 -0.643 0.5315

fTIERINGpelagic 0.8460 1.5784 0.536 0.6010

fFEEDINGphotosymbiotic 1.5392 2.4689 0.623 0.5438

fFEEDINGpredatory NA NA NA NA

fFEEDINGsuspension 0.6659 0.9222 0.722 0.4831

fCALCIFICATIONmoderate -1.9654 1.2570 -1.564 0.1419

---

Signif. codes: 0 ‘***’ 0.001 ‘**’ 0.01 ‘*’ 0.05 ‘.’ 0.1 ‘ ’ 1

(Dispersion parameter for quasibinomial family taken to be 0.2485554)

Null deviance: 6.1229 on 19 degrees of freedom

Residual deviance: 3.6698 on 13 degrees of freedom

AIC: NA

Number of Fisher Scoring iterations: 6

>

> # find best model

>

> drop1(GLM_LTE_A4ii, test = "F")

Single term deletions

Model:

extinction ~ fMOTILITY + fTIERING + fFEEDING + fCALCIFICATION

Df Deviance F value Pr(>F)

<none> 3.6698

fMOTILITY 1 3.7409 0.2521 0.6240

fTIERING 1 3.7737 0.3683 0.5544

fFEEDING 2 3.8385 0.2988 0.7467

fCALCIFICATION 1 4.5139 2.9904 0.1074

>

**Model = intrinsic no env**

> GLM_LTE_B4ii <- glm(extinction ~ fMOTILITY + fTIERING + fFEEDING +

+ fCALCIFICATION,

+ family = quasibinomial, data = LTE)

> summary(GLM_LTE_B4ii)

Call:

glm(formula = extinction ~ fMOTILITY + fTIERING + fFEEDING +

fCALCIFICATION, family = quasibinomial, data = LTE)

Deviance Residuals:

Min 1Q Median 3Q Max

-0.8854 -0.2175 0.1099 0.2983 0.8137

Coefficients:

Estimate Std. Error t value Pr(>|t|)

(Intercept) 0.05624 0.87501 0.064 0.9493

fMOTILITYnonmotile -0.12162 0.47360 -0.257 0.7994

fTIERINGinfaunal -0.28702 0.49595 -0.579 0.5680

fTIERINGpelagic -0.76296 1.31530 -0.580 0.5671

fFEEDINGgrazing -1.16221 1.41697 -0.820 0.4198

fFEEDINGphotosymbiotic 3.15546 1.43793 2.194 0.0377 *

fFEEDINGpredatory 3.37268 1.53674 2.195 0.0377 *

fFEEDINGsuspension 1.38256 0.75596 1.829 0.0794 .

fCALCIFICATIONlight -1.68717 1.26360 -1.335 0.1938

fCALCIFICATIONmoderate -0.50346 0.57528 -0.875 0.3898

---

Signif. codes: 0 ‘***’ 0.001 ‘**’ 0.01 ‘*’ 0.05 ‘.’ 0.1 ‘ ’ 1

(Dispersion parameter for quasibinomial family taken to be 0.2078436)

Null deviance: 11.2997 on 34 degrees of freedom

Residual deviance: 5.8432 on 25 degrees of freedom

AIC: NA

Number of Fisher Scoring iterations: 5

>

> # find best model

>

> drop1(GLM_LTE_B4ii, test = "F")

Single term deletions

Model:

extinction ~ fMOTILITY + fTIERING + fFEEDING + fCALCIFICATION

Df Deviance F value Pr(>F)

<none> 5.8432

fMOTILITY 1 5.8569 0.0588 0.8104

fTIERING 2 5.9886 0.3111 0.7354

fFEEDING 4 9.0390 3.4183 0.0232 *

fCALCIFICATION 2 6.2321 0.8320 0.4469

---

Signif. codes: 0 ‘***’ 0.001 ‘**’ 0.01 ‘*’ 0.05 ‘.’ 0.1 ‘ ’ 1

>

> # best model

>

> GLM_LTE_B4iii <- glm(extinction ~ fFEEDING,

+ family = quasibinomial, data = LTE)

> summary(GLM_LTE_B4iii)

Call:

glm(formula = extinction ~ fFEEDING, family = quasibinomial,

data = LTE)

Deviance Residuals:

Min 1Q Median 3Q Max

-0.94003 -0.24861 0.07654 0.30255 0.81753

Coefficients:

Estimate Std. Error t value Pr(>|t|)

(Intercept) -0.5878 0.6253 -0.940 0.35471

fFEEDINGgrazing -1.0217 1.2975 -0.787 0.43724

fFEEDINGphotosymbiotic 3.6779 1.2119 3.035 0.00494 **

fFEEDINGpredatory 2.5197 0.7893 3.192 0.00330 **

fFEEDINGsuspension 1.5121 0.6580 2.298 0.02871 *

---

Signif. codes: 0 ‘***’ 0.001 ‘**’ 0.01 ‘*’ 0.05 ‘.’ 0.1 ‘ ’ 1

(Dispersion parameter for quasibinomial family taken to be 0.1795301)

Null deviance: 11.2997 on 34 degrees of freedom

Residual deviance: 6.4135 on 30 degrees of freedom

AIC: NA

Number of Fisher Scoring iterations: 5

**EToE**

**Model = all**

> GLM_OAE_A1ii <- glm(extinction ~ fMOTILITY + fTIERING + fFEEDING +

+ fLATITUDE + fBASIN + fENVIRONMENT +

+ fCALCIFICATION,

+ family = quasibinomial, data = OAE)

> summary(GLM_OAE_A1ii)

Call:

glm(formula = extinction ~ fMOTILITY + fTIERING + fFEEDING +

fLATITUDE + fBASIN + fENVIRONMENT + fCALCIFICATION, family = quasibinomial,

data = OAE)

Deviance Residuals:

Min 1Q Median 3Q Max

-0.4337 -0.1391 0.0000 0.2102 0.4509

Coefficients:

Estimate Std. Error t value Pr(>|t|)

(Intercept) 0.7777 1.1233 0.692 0.5031

fMOTILITYnonmotile 0.7891 0.5491 1.437 0.1785

fTIERINGinfaunal -0.1401 0.4658 -0.301 0.7693

fTIERINGpelagic 1.1627 1.0537 1.103 0.2934

fFEEDINGgrazing 1.1905 0.7983 1.491 0.1640

fFEEDINGphotosymbiotic -1.7160 1.2277 -1.398 0.1897

fFEEDINGpredatory 0.7080 0.9654 0.733 0.4787

fFEEDINGsuspension -0.3624 0.7043 -0.515 0.6170

fLATITUDET -1.0360 0.5591 -1.853 0.0909 .

fBASINTethys 0.8423 0.5712 1.475 0.1683

fENVIRONMENTOffshore -1.3328 0.6372 -2.092 0.0605 .

fENVIRONMENTReef 3.3873 1.8921 1.790 0.1009

fCALCIFICATIONmoderate 0.1033 0.6401 0.161 0.8747

---

Signif. codes: 0 ‘***’ 0.001 ‘**’ 0.01 ‘*’ 0.05 ‘.’ 0.1 ‘ ’ 1

(Dispersion parameter for quasibinomial family taken to be 0.1186548)

Null deviance: 4.1787 on 23 degrees of freedom

Residual deviance: 1.3477 on 11 degrees of freedom

AIC: NA

Number of Fisher Scoring iterations: 5

>

> # find best model

>

> drop1(GLM_OAE_A1ii, test = "F")

Single term deletions

Model:

extinction ~ fMOTILITY + fTIERING + fFEEDING + fLATITUDE + fBASIN +

fENVIRONMENT + fCALCIFICATION

Df Deviance F value Pr(>F)

<none> 1.3477

fMOTILITY 1 1.5974 2.0381 0.18117

fTIERING 2 1.4956 0.6036 0.56398

fFEEDING 4 2.0222 1.3763 0.30423

fLATITUDE 1 1.7801 3.5289 0.08705 .

fBASIN 1 1.6114 2.1526 0.17033

fENVIRONMENT 2 2.2438 3.6571 0.06058 .

fCALCIFICATION 1 1.3508 0.0252 0.87681

---

Signif. codes: 0 ‘***’ 0.001 ‘**’ 0.01 ‘*’ 0.05 ‘.’ 0.1 ‘ ’ 1

>

> GLM_OAE_A1iii <- glm(extinction ~ fENVIRONMENT,

+ family = quasibinomial, data = post)

>

> summary(GLM_OAE_A1iii)

Call:

glm(formula = extinction ~ fENVIRONMENT, family = quasibinomial,

data = post)

Deviance Residuals:

Min 1Q Median 3Q Max

-1.20688 -0.35287 -0.00746 0.35180 1.15096

Coefficients:

Estimate Std. Error t value Pr(>|t|)

(Intercept) 0.069080 0.205914 0.335 0.739

fENVIRONMENTOffshore -0.006514 0.308166 -0.021 0.983

fENVIRONMENTReef -1.860839 1.175805 -1.583 0.119

(Dispersion parameter for quasibinomial family taken to be 0.3282142)

Null deviance: 23.615 on 57 degrees of freedom

Residual deviance: 22.425 on 55 degrees of freedom

AIC: NA

Number of Fisher Scoring iterations: 4

**Model = all no env**

> GLM_OAE_B1ii <- glm(extinction ~ fMOTILITY + fTIERING + fFEEDING +

+ fLATITUDE + fBASIN + fCALCIFICATION,

+ family = quasibinomial, data = OAE)

> summary(GLM_OAE_B1ii)

Call:

glm(formula = extinction ~ fMOTILITY + fTIERING + fFEEDING +

fLATITUDE + fBASIN + fCALCIFICATION, family = quasibinomial,

data = OAE)

Deviance Residuals:

Min 1Q Median 3Q Max

-0.72266 -0.16491 0.01584 0.13465 0.39736

Coefficients:

Estimate Std. Error t value Pr(>|t|)

(Intercept) 1.5538 0.8060 1.928 0.065311 .

fMOTILITYnonmotile 0.6758 0.2645 2.554 0.017111 *

fTIERINGinfaunal -0.3910 0.2695 -1.451 0.159156

fTIERINGpelagic 1.3641 0.7013 1.945 0.063097 .

fFEEDINGgrazing 0.9163 0.6374 1.438 0.162935

fFEEDINGphotosymbiotic 1.7089 0.7801 2.191 0.038023 *

fFEEDINGpredatory 0.2133 0.7339 0.291 0.773756

fFEEDINGsuspension -0.1212 0.4878 -0.248 0.805786

fLATITUDEP -1.2973 0.5271 -2.461 0.021108 *

fLATITUDET -0.2105 0.2368 -0.889 0.382505

fBASINPanthalassa -2.0205 0.5022 -4.023 0.000467 ***

fBASINTethys -1.8369 0.5214 -3.523 0.001667 **

fCALCIFICATIONlight -1.5820 0.7751 -2.041 0.051937 .

fCALCIFICATIONmoderate 0.2521 0.3502 0.720 0.478244

---

Signif. codes: 0 ‘***’ 0.001 ‘**’ 0.01 ‘*’ 0.05 ‘.’ 0.1 ‘ ’ 1

(Dispersion parameter for quasibinomial family taken to be 0.08575427)

Null deviance: 8.2940 on 38 degrees of freedom

Residual deviance: 2.3843 on 25 degrees of freedom

AIC: NA

Number of Fisher Scoring iterations: 4

>

> # find best model

>

> drop1(GLM_OAE_B1ii, test = "F")

Single term deletions

Model:

extinction ~ fMOTILITY + fTIERING + fFEEDING + fLATITUDE + fBASIN +

fCALCIFICATION

Df Deviance F value Pr(>F)

<none> 2.3843

fMOTILITY 1 2.9536 5.9686 0.021967 *

fTIERING 2 2.8716 2.5548 0.097824 .

fFEEDING 4 3.8265 3.7802 0.015446 *

fLATITUDE 2 2.9693 3.0667 0.064403 .

fBASIN 2 4.0320 8.6382 0.001406 **

fCALCIFICATION 2 3.0072 3.2653 0.054965 .

---

Signif. codes: 0 ‘***’ 0.001 ‘**’ 0.01 ‘*’ 0.05 ‘.’ 0.1 ‘ ’ 1

>

> # motility, feeding, basin and calcification

>

> GLM_OAE_B1iii <- glm(extinction ~ fMOTILITY + fFEEDING +

+ fBASIN + fCALCIFICATION,

+ family = quasibinomial, data = OAE)

> summary(GLM_OAE_B1iii)

Call:

glm(formula = extinction ~ fMOTILITY + fFEEDING + fBASIN + fCALCIFICATION,

family = quasibinomial, data = OAE)

Deviance Residuals:

Min 1Q Median 3Q Max

-1.05867 -0.06024 0.06304 0.17024 0.47845

Coefficients:

Estimate Std. Error t value Pr(>|t|)

(Intercept) 0.7819 0.7250 1.078 0.28975

fMOTILITYnonmotile 0.5395 0.2818 1.914 0.06551 .

fFEEDINGgrazing 1.0024 0.6641 1.509 0.14200

fFEEDINGphotosymbiotic 1.9016 0.8129 2.339 0.02641 *

fFEEDINGpredatory 1.3548 0.5620 2.411 0.02249 *

fFEEDINGsuspension -0.1287 0.5147 -0.250 0.80428

fBASINPanthalassa -1.4785 0.4084 -3.620 0.00111 **

fBASINTethys -1.2531 0.4027 -3.112 0.00415 **

fCALCIFICATIONlight -1.1713 0.7957 -1.472 0.15178

fCALCIFICATIONmoderate 0.2469 0.3424 0.721 0.47666

---

Signif. codes: 0 ‘***’ 0.001 ‘**’ 0.01 ‘*’ 0.05 ‘.’ 0.1 ‘ ’ 1

(Dispersion parameter for quasibinomial family taken to be 0.1015277)

Null deviance: 8.294 on 38 degrees of freedom

Residual deviance: 3.348 on 29 degrees of freedom

AIC: NA

Number of Fisher Scoring iterations: 4

>

> drop1(GLM_OAE_B1iii, test = "F")

Single term deletions

Model:

extinction ~ fMOTILITY + fFEEDING + fBASIN + fCALCIFICATION

Df Deviance F value Pr(>F)

<none> 3.3480

fMOTILITY 1 3.7264 3.2771 0.0806257 .

fFEEDING 4 6.9142 7.7223 0.0002299 ***

fBASIN 2 4.8737 6.6073 0.0043207 **

fCALCIFICATION 2 3.7888 1.9088 0.1664198

---

Signif. codes: 0 ‘***’ 0.001 ‘**’ 0.01 ‘*’ 0.05 ‘.’ 0.1 ‘ ’ 1

>

> # best model

> GLM_OAE_B1iv <- glm(extinction ~ fFEEDING + fBASIN,

+ family = quasibinomial, data = OAE)

> summary(GLM_OAE_B1iv)

Call:

glm(formula = extinction ~ fFEEDING + fBASIN, family = quasibinomial,

data = OAE)

Deviance Residuals:

Min 1Q Median 3Q Max

-1.06388 -0.16613 0.02477 0.21597 0.51343

Coefficients:

Estimate Std. Error t value Pr(>|t|)

(Intercept) 0.9920 0.6327 1.568 0.12674

fFEEDINGgrazing 1.0024 0.7081 1.416 0.16656

fFEEDINGphotosymbiotic 2.1544 0.7617 2.828 0.00801 **

fFEEDINGpredatory 1.0702 0.5717 1.872 0.07039 .

fFEEDINGsuspension 0.0665 0.5207 0.128 0.89918

fBASINPanthalassa -1.3316 0.4153 -3.206 0.00305 **

fBASINTethys -1.2164 0.4081 -2.981 0.00546 **

---

Signif. codes: 0 ‘***’ 0.001 ‘**’ 0.01 ‘*’ 0.05 ‘.’ 0.1 ‘ ’ 1

(Dispersion parameter for quasibinomial family taken to be 0.1154421)

Null deviance: 8.2940 on 38 degrees of freedom

Residual deviance: 4.1213 on 32 degrees of freedom

AIC: NA

Number of Fisher Scoring iterations: 4

**Model = extrinsic**

> GLM_OAE_A3ii <- glm(extinction ~ fLATITUDE + fBASIN + fENVIRONMENT,

+ family = quasibinomial, data = OAE)

> summary(GLM_OAE_A3ii)

Call:

glm(formula = extinction ~ fLATITUDE + fBASIN + fENVIRONMENT,

family = quasibinomial, data = OAE)

Deviance Residuals:

Min 1Q Median 3Q Max

-0.82785 -0.19980 0.02194 0.30345 0.68123

Coefficients:

Estimate Std. Error t value Pr(>|t|)

(Intercept) 0.4679 0.5296 0.884 0.388

fLATITUDET -0.3157 0.4468 -0.707 0.488

fBASINTethys 0.8458 0.5224 1.619 0.122

fENVIRONMENTOffshore -0.4707 0.4937 -0.953 0.352

fENVIRONMENTReef 2.0464 1.9653 1.041 0.311

(Dispersion parameter for quasibinomial family taken to be 0.1625729)

Null deviance: 4.1787 on 23 degrees of freedom

Residual deviance: 3.2273 on 19 degrees of freedom

AIC: NA

Number of Fisher Scoring iterations: 5

>

> # find best model

>

> drop1(GLM_OAE_A3ii, test = "F")

Single term deletions

Model:

extinction ~ fLATITUDE + fBASIN + fENVIRONMENT

Df Deviance F value Pr(>F)

<none> 3.2273

fLATITUDE 1 3.3089 0.4802 0.4967

fBASIN 1 3.6534 2.5082 0.1298

fENVIRONMENT 2 3.7659 1.5854 0.2308

>

**Model = extrinsic no env**

> GLM_OAE_B3ii <- glm(extinction ~ fLATITUDE + fBASIN,

+ family = quasibinomial, data = OAE)

> summary(GLM_OAE_B3ii)

Call:

glm(formula = extinction ~ fLATITUDE + fBASIN, family = quasibinomial,

data = OAE)

Deviance Residuals:

Min 1Q Median 3Q Max

-0.85850 -0.31552 -0.02386 0.29006 0.88380

Coefficients:

Estimate Std. Error t value Pr(>|t|)

(Intercept) 1.76124 0.67687 2.602 0.0136 *

fLATITUDEP -0.83310 0.70090 -1.189 0.2428

fLATITUDET 0.08532 0.30341 0.281 0.7803

fBASINPanthalassa -1.73653 0.69143 -2.512 0.0169 *

fBASINTethys -1.53097 0.70095 -2.184 0.0359 *

---

Signif. codes: 0 ‘***’ 0.001 ‘**’ 0.01 ‘*’ 0.05 ‘.’ 0.1 ‘ ’ 1

(Dispersion parameter for quasibinomial family taken to be 0.1816417)

Null deviance: 8.2940 on 38 degrees of freedom

Residual deviance: 6.8489 on 34 degrees of freedom

AIC: NA

Number of Fisher Scoring iterations: 4

>

> # find best model

>

> drop1(GLM_OAE_B3ii, test = "F")

Single term deletions

Model:

extinction ~ fLATITUDE + fBASIN

Df Deviance F value Pr(>F)

<none> 6.8489

fLATITUDE 2 7.1629 0.7795 0.46668

fBASIN 2 8.2454 3.4663 0.04265 *

---

Signif. codes: 0 ‘***’ 0.001 ‘**’ 0.01 ‘*’ 0.05 ‘.’ 0.1 ‘ ’ 1

>

> # best model

>

> GLM_OAE_B3iii <- glm(extinction ~ fBASIN,

+ family = quasibinomial, data = OAE)

> summary(GLM_OAE_B3iii)

Call:

glm(formula = extinction ~ fBASIN, family = quasibinomial, data = OAE)

Deviance Residuals:

Min 1Q Median 3Q Max

-1.18153 -0.25543 -0.03494 0.30631 0.86954

Coefficients:

Estimate Std. Error t value Pr(>|t|)

(Intercept) 1.2160 0.4466 2.723 0.00991 **

fBASINPanthalassa -1.2064 0.5035 -2.396 0.02190 *

fBASINTethys -0.9534 0.4832 -1.973 0.05621 .

---

Signif. codes: 0 ‘***’ 0.001 ‘**’ 0.01 ‘*’ 0.05 ‘.’ 0.1 ‘ ’ 1

(Dispersion parameter for quasibinomial family taken to be 0.175851)

Null deviance: 8.2940 on 38 degrees of freedom

Residual deviance: 7.1629 on 36 degrees of freedom

AIC: NA

Number of Fisher Scoring iterations: 4

**Model = intrinsic**

> GLM_OAE_A4ii <- glm(extinction ~ fMOTILITY + fTIERING + fFEEDING +

+ fCALCIFICATION,

+ family = quasibinomial, data = OAE)

> summary(GLM_OAE_A4ii)

Call:

glm(formula = extinction ~ fMOTILITY + fTIERING + fFEEDING +

fCALCIFICATION, family = quasibinomial, data = OAE)

Deviance Residuals:

Min 1Q Median 3Q Max

-0.50167 -0.26405 -0.00598 0.31718 0.51395

Coefficients:

Estimate Std. Error t value Pr(>|t|)

(Intercept) 0.865721 0.835866 1.036 0.317

fMOTILITYnonmotile 0.586772 0.546392 1.074 0.300

fTIERINGinfaunal -0.408294 0.492615 -0.829 0.420

fTIERINGpelagic 0.792790 1.106530 0.716 0.485

fFEEDINGgrazing 0.718156 0.810390 0.886 0.390

fFEEDINGphotosymbiotic 0.001459 1.107503 0.001 0.999

fFEEDINGpredatory 0.570980 1.078225 0.530 0.604

fFEEDINGsuspension -0.281368 0.685727 -0.410 0.687

fCALCIFICATIONmoderate -0.338089 0.645988 -0.523 0.608

(Dispersion parameter for quasibinomial family taken to be 0.1482437)

Null deviance: 4.1787 on 23 degrees of freedom

Residual deviance: 2.3502 on 15 degrees of freedom

AIC: NA

Number of Fisher Scoring iterations: 4

>

> # find best model

>

> drop1(GLM_OAE_A4ii, test = "F")

Single term deletions

Model:

extinction ~ fMOTILITY + fTIERING + fFEEDING + fCALCIFICATION

Df Deviance F value Pr(>F)

<none> 2.3502

fMOTILITY 1 2.5215 1.0938 0.3122

fTIERING 2 2.5248 0.5572 0.5842

fFEEDING 4 2.6545 0.4857 0.7462

fCALCIFICATION 1 2.3916 0.2642 0.6148

>

**Model = intrinsic no env**

> GLM_OAE_B4ii <- glm(extinction ~ fMOTILITY + fTIERING + fFEEDING +

+ fCALCIFICATION,

+ family = quasibinomial, data = OAE)

> summary(GLM_OAE_B4ii)

Call:

glm(formula = extinction ~ fMOTILITY + fTIERING + fFEEDING +

fCALCIFICATION, family = quasibinomial, data = OAE)

Deviance Residuals:

Min 1Q Median 3Q Max

-1.09670 -0.21032 0.05265 0.18855 0.54955

Coefficients:

Estimate Std. Error t value Pr(>|t|)

(Intercept) -0.60947 0.64645 -0.943 0.3536

fMOTILITYnonmotile 0.32053 0.30686 1.045 0.3049

fTIERINGinfaunal -0.45118 0.31438 -1.435 0.1619

fTIERINGpelagic 1.28321 0.84016 1.527 0.1375

fFEEDINGgrazing 0.77966 0.77486 1.006 0.3226

fFEEDINGphotosymbiotic 2.17951 0.91122 2.392 0.0235 *

fFEEDINGpredatory 0.18390 0.90933 0.202 0.8411

fFEEDINGsuspension 0.09612 0.56283 0.171 0.8656

fCALCIFICATIONlight -1.14531 0.93795 -1.221 0.2319

fCALCIFICATIONmoderate 0.60790 0.40898 1.486 0.1480

---

Signif. codes: 0 ‘***’ 0.001 ‘**’ 0.01 ‘*’ 0.05 ‘.’ 0.1 ‘ ’ 1

(Dispersion parameter for quasibinomial family taken to be 0.1320506)

Null deviance: 8.2940 on 38 degrees of freedom

Residual deviance: 4.3038 on 29 degrees of freedom

AIC: NA

Number of Fisher Scoring iterations: 4

>

> # find best model

>

> drop1(GLM_OAE_B4ii, test = "F")

Single term deletions

Model:

extinction ~ fMOTILITY + fTIERING + fFEEDING + fCALCIFICATION

Df Deviance F value Pr(>F)

<none> 4.3038

fMOTILITY 1 4.4486 0.9758 0.33142

fTIERING 2 4.8737 1.9200 0.16479

fFEEDING 4 5.9884 2.8378 0.04223 *

fCALCIFICATION 2 5.1747 2.9342 0.06910 .

---

Signif. codes: 0 ‘***’ 0.001 ‘**’ 0.01 ‘*’ 0.05 ‘.’ 0.1 ‘ ’ 1

>

> # best model

>

> GLM_OAE_B4iv <- glm(extinction ~ fFEEDING,

+ family = quasibinomial, data = OAE)

> summary(GLM_OAE_B4iv)

Call:

glm(formula = extinction ~ fFEEDING, family = quasibinomial,

data = OAE)

Deviance Residuals:

Min 1Q Median 3Q Max

-1.16779 -0.21337 0.07018 0.28404 0.70741

Coefficients:

Estimate Std. Error t value Pr(>|t|)

(Intercept) -0.2243 0.5481 -0.409 0.6849

fFEEDINGgrazing 1.0024 0.8026 1.249 0.2202

fFEEDINGphotosymbiotic 2.1149 0.8568 2.468 0.0188 *

fFEEDINGpredatory 1.1659 0.6367 1.831 0.0758 .

fFEEDINGsuspension 0.2016 0.5693 0.354 0.7254

---

Signif. codes: 0 ‘***’ 0.001 ‘**’ 0.01 ‘*’ 0.05 ‘.’ 0.1 ‘ ’ 1

(Dispersion parameter for quasibinomial family taken to be 0.1483219)

Null deviance: 8.294 on 38 degrees of freedom

Residual deviance: 5.546 on 34 degrees of freedom

AIC: NA

Number of Fisher Scoring iterations: 4

**Triassic background**

Model = all

> GLM_pre_A1ii <- glm(extinction ~ fMOTILITY + fTIERING + fFEEDING +

+ fLATITUDE + fBASIN + fENVIRONMENT +

+ fCALCIFICATION,

+ family = quasibinomial, data = pre)

> summary(GLM_pre_A1ii)

Call:

glm(formula = extinction ~ fMOTILITY + fTIERING + fFEEDING +

fLATITUDE + fBASIN + fENVIRONMENT + fCALCIFICATION, family = quasibinomial,

data = pre)

Deviance Residuals:

Min 1Q Median 3Q Max

-1.0239 -0.2825 0.0781 0.3665 0.7342

Coefficients: (1 not defined because of singularities)

Estimate Std. Error t value Pr(>|t|)

(Intercept) 2.307822 1.126560 2.049 0.0479 *

fMOTILITYnonmotile -0.001491 0.475700 -0.003 0.9975

fTIERINGinfaunal -0.205156 0.553408 -0.371 0.7130

fTIERINGpelagic 0.611297 0.891845 0.685 0.4975

fFEEDINGphotosymbiotic -1.734707 1.161870 -1.493 0.1441

fFEEDINGpredatory NA NA NA NA

fFEEDINGsuspension -0.609533 0.809037 -0.753 0.4561

fLATITUDET -0.369263 0.552370 -0.669 0.5081

fBASINTethys -0.029463 0.632788 -0.047 0.9631

fENVIRONMENTOffshore 0.146258 0.821322 0.178 0.8597

fENVIRONMENTReef -0.438626 0.491499 -0.892 0.3781

fCALCIFICATIONlight -0.778322 0.724403 -1.074 0.2898

fCALCIFICATIONmoderate -0.821088 0.571830 -1.436 0.1597

---

Signif. codes: 0 ‘***’ 0.001 ‘**’ 0.01 ‘*’ 0.05 ‘.’ 0.1 ‘ ’ 1

(Dispersion parameter for quasibinomial family taken to be 0.2401432)

Null deviance: 13.8327 on 47 degrees of freedom

Residual deviance: 9.1254 on 36 degrees of freedom

AIC: NA

Number of Fisher Scoring iterations: 4

>

> # find best model

>

> drop1(GLM_pre_A1ii, test = "F")

Single term deletions

Model:

extinction ~ fMOTILITY + fTIERING + fFEEDING + fLATITUDE + fBASIN +

fENVIRONMENT + fCALCIFICATION

Df Deviance F value Pr(>F)

<none> 9.1254

fMOTILITY 1 9.1254 0.0000 0.9976

fTIERING 1 9.1584 0.1302 0.7204

fFEEDING 2 9.7804 1.2920 0.2872

fLATITUDE 1 9.2353 0.4334 0.5145

fBASIN 1 9.1260 0.0021 0.9641

fENVIRONMENT 2 9.3238 0.3912 0.6791

fCALCIFICATION 2 9.6563 1.0471 0.3614

>

**Model = all no env**

> GLM_pre_B1ii <- glm(extinction ~ fMOTILITY + fTIERING + fFEEDING +

+ fLATITUDE + fBASIN + fCALCIFICATION,

+ family = quasibinomial, data = pre)

> summary(GLM_pre_B1ii)

Call:

glm(formula = extinction ~ fMOTILITY + fTIERING + fFEEDING +

fLATITUDE + fBASIN + fCALCIFICATION, family = quasibinomial,

data = pre)

Deviance Residuals:

Min 1Q Median 3Q Max

-1.30649 -0.24242 0.03913 0.31504 1.06498

Coefficients:

Estimate Std. Error t value Pr(>|t|)

(Intercept) 0.493783 0.609139 0.811 0.420

fMOTILITYnonmotile 0.132692 0.255165 0.520 0.604

fTIERINGinfaunal -0.249179 0.288659 -0.863 0.390

fTIERINGpelagic 0.422510 0.386715 1.093 0.278

fFEEDINGgrazing -0.221395 0.879548 -0.252 0.802

fFEEDINGother -0.773554 1.111817 -0.696 0.488

fFEEDINGphotosymbiotic -0.867489 0.713520 -1.216 0.227

fFEEDINGpredatory 0.415223 0.689365 0.602 0.549

fFEEDINGsuspension -0.501679 0.610900 -0.821 0.414

fLATITUDEP -0.002709 0.397414 -0.007 0.995

fLATITUDET -0.245379 0.223035 -1.100 0.274

fBASINPanthalassa 0.438921 0.406209 1.081 0.283

fBASINTethys 0.129194 0.440649 0.293 0.770

fCALCIFICATIONlight -0.275846 0.441214 -0.625 0.533

fCALCIFICATIONmoderate -0.048012 0.292650 -0.164 0.870

(Dispersion parameter for quasibinomial family taken to be 0.1870975)

Null deviance: 24.442 on 100 degrees of freedom

Residual deviance: 17.897 on 86 degrees of freedom

AIC: NA

Number of Fisher Scoring iterations: 4

> # find best model

>

> drop1(GLM_pre_B1ii, test = "F")

Single term deletions

Model:

extinction ~ fMOTILITY + fTIERING + fFEEDING + fLATITUDE + fBASIN +

fCALCIFICATION

Df Deviance F value Pr(>F)

<none> 17.897

fMOTILITY 1 17.948 0.2431 0.6232

fTIERING 2 18.279 0.9181 0.4032

fFEEDING 5 19.132 1.1867 0.3224

fLATITUDE 2 18.141 0.5861 0.5587

fBASIN 2 18.465 1.3633 0.2613

fCALCIFICATION 2 17.979 0.1956 0.8227

>

**Model = extrinsic**

> GLM_pre_A3ii <- glm(extinction ~ fLATITUDE + fBASIN + fENVIRONMENT,

+ family = quasibinomial, data = pre)

> summary(GLM_pre_A3ii)

Call:

glm(formula = extinction ~ fLATITUDE + fBASIN + fENVIRONMENT,

family = quasibinomial, data = pre)

Deviance Residuals:

Min 1Q Median 3Q Max

-1.21401 -0.28266 0.08969 0.32510 0.83503

Coefficients:

Estimate Std. Error t value Pr(>|t|)

(Intercept) 0.9568 0.5688 1.682 0.0998 .

fLATITUDET 0.1052 0.5020 0.210 0.8350

fBASINTethys -0.1877 0.5423 -0.346 0.7309

fENVIRONMENTOffshore 1.0662 0.6413 1.663 0.1036

fENVIRONMENTReef -0.7343 0.3295 -2.229 0.0311 *

---

Signif. codes: 0 ‘***’ 0.001 ‘**’ 0.01 ‘*’ 0.05 ‘.’ 0.1 ‘ ’ 1

(Dispersion parameter for quasibinomial family taken to be 0.2421453)

Null deviance: 13.833 on 47 degrees of freedom

Residual deviance: 11.197 on 43 degrees of freedom

AIC: NA

Number of Fisher Scoring iterations: 4

>

> # find best model

>

> drop1(GLM_pre_A3ii, test = "F")

Single term deletions

Model:

extinction ~ fLATITUDE + fBASIN + fENVIRONMENT

Df Deviance F value Pr(>F)

<none> 11.197

fLATITUDE 1 11.207 0.0405 0.84141

fBASIN 1 11.226 0.1132 0.73814

fENVIRONMENT 2 13.831 5.0590 0.01064 *

---

Signif. codes: 0 ‘***’ 0.001 ‘**’ 0.01 ‘*’ 0.05 ‘.’ 0.1 ‘ ’ 1

>

> # best model

>

> GLM_pre_A3iii <- glm(extinction ~ fENVIRONMENT,

+ family = quasibinomial, data = pre)

> summary(GLM_pre_A3iii)

Call:

glm(formula = extinction ~ fENVIRONMENT, family = quasibinomial,

data = pre)

Deviance Residuals:

Min 1Q Median 3Q Max

-1.2179 -0.2782 0.1173 0.3223 0.8322

Coefficients:

Estimate Std. Error t value Pr(>|t|)

(Intercept) 0.8824 0.2038 4.330 8.24e-05 ***

fENVIRONMENTOffshore 1.0400 0.6238 1.667 0.102

fENVIRONMENTReef -0.7314 0.3222 -2.270 0.028 *

---

Signif. codes: 0 ‘***’ 0.001 ‘**’ 0.01 ‘*’ 0.05 ‘.’ 0.1 ‘ ’ 1

(Dispersion parameter for quasibinomial family taken to be 0.232193)

Null deviance: 13.833 on 47 degrees of freedom

Residual deviance: 11.228 on 45 degrees of freedom

AIC: NA

Number of Fisher Scoring iterations: 4

**Model = extrinsic no env**

> GLM_pre_B3ii <- glm(extinction ~ fLATITUDE + fBASIN,

+ family = quasibinomial, data = pre)

> summary(GLM_pre_B3ii)

Call:

glm(formula = extinction ~ fLATITUDE + fBASIN, family = quasibinomial,

data = pre)

Deviance Residuals:

Min 1Q Median 3Q Max

-1.29562 -0.30561 0.02562 0.39844 1.02334

Coefficients:

Estimate Std. Error t value Pr(>|t|)

(Intercept) 0.35325 0.39494 0.894 0.373

fLATITUDEP -0.07958 0.38308 -0.208 0.836

fLATITUDET -0.24219 0.22525 -1.075 0.285

fBASINPanthalassa 0.26273 0.39198 0.670 0.504

fBASINTethys 0.02883 0.42502 0.068 0.946

(Dispersion parameter for quasibinomial family taken to be 0.2223776)

Null deviance: 24.442 on 100 degrees of freedom

Residual deviance: 23.767 on 96 degrees of freedom

AIC: NA

Number of Fisher Scoring iterations: 3

>

> # find best model

>

> drop1(GLM_pre_B3ii, test = "F")

Single term deletions

Model:

extinction ~ fLATITUDE + fBASIN

Df Deviance F value Pr(>F)

<none> 23.767

fLATITUDE 2 24.025 0.5220 0.5950

fBASIN 2 24.093 0.6592 0.5196

>

**Model = intrinsic**

> GLM_pre_A4ii <- glm(extinction ~ fMOTILITY + fTIERING + fFEEDING +

+ fCALCIFICATION,

+ family = quasibinomial, data = pre)

> summary(GLM_pre_A4ii)

Call:

glm(formula = extinction ~ fMOTILITY + fTIERING + fFEEDING +

fCALCIFICATION, family = quasibinomial, data = pre)

Deviance Residuals:

Min 1Q Median 3Q Max

-0.9961 -0.2672 0.1008 0.3637 0.6452

Coefficients: (1 not defined because of singularities)

Estimate Std. Error t value Pr(>|t|)

(Intercept) 1.85156 0.84290 2.197 0.0339 *

fMOTILITYnonmotile -0.06775 0.45827 -0.148 0.8832

fTIERINGinfaunal -0.02356 0.47980 -0.049 0.9611

fTIERINGpelagic 0.78405 0.78742 0.996 0.3254

fFEEDINGphotosymbiotic -1.88930 0.97094 -1.946 0.0587 .

fFEEDINGpredatory NA NA NA NA

fFEEDINGsuspension -0.71681 0.74704 -0.960 0.3431

fCALCIFICATIONlight -0.88807 0.69239 -1.283 0.2070

fCALCIFICATIONmoderate -0.76356 0.55221 -1.383 0.1744

---

Signif. codes: 0 ‘***’ 0.001 ‘**’ 0.01 ‘*’ 0.05 ‘.’ 0.1 ‘ ’ 1

(Dispersion parameter for quasibinomial family taken to be 0.2293279)

Null deviance: 13.8327 on 47 degrees of freedom

Residual deviance: 9.5384 on 40 degrees of freedom

AIC: NA

Number of Fisher Scoring iterations: 4

>

> # find best model

>

> drop1(GLM_pre_A4ii, test = "F")

Single term deletions

Model:

extinction ~ fMOTILITY + fTIERING + fFEEDING + fCALCIFICATION

Df Deviance F value Pr(>F)

<none> 9.5384

fMOTILITY 1 9.5434 0.0210 0.8854

fTIERING 1 9.5389 0.0023 0.9618

fFEEDING 2 10.6146 2.2568 0.1179

fCALCIFICATION 2 10.0601 1.0941 0.3447

>

**Model = intrinsic no env**

> GLM_pre_B4ii <- glm(extinction ~ fMOTILITY + fTIERING + fFEEDING +

+ fCALCIFICATION,

+ family = quasibinomial, data = pre)

> summary(GLM_pre_B4ii)

Call:

glm(formula = extinction ~ fMOTILITY + fTIERING + fFEEDING +

fCALCIFICATION, family = quasibinomial, data = pre)

Deviance Residuals:

Min 1Q Median 3Q Max

-1.43602 -0.23872 0.07058 0.28717 1.09648

Coefficients:

Estimate Std. Error t value Pr(>|t|)

(Intercept) 0.55518 0.58195 0.954 0.343

fMOTILITYnonmotile 0.11194 0.25563 0.438 0.663

fTIERINGinfaunal -0.26538 0.27564 -0.963 0.338

fTIERINGpelagic 0.44883 0.38590 1.163 0.248

fFEEDINGgrazing -0.38720 0.80757 -0.479 0.633

fFEEDINGother -0.92316 1.07130 -0.862 0.391

fFEEDINGphotosymbiotic -0.77628 0.66080 -1.175 0.243

fFEEDINGpredatory 0.44291 0.63581 0.697 0.488

fFEEDINGsuspension -0.41397 0.54340 -0.762 0.448

fCALCIFICATIONlight -0.42882 0.42755 -1.003 0.319

fCALCIFICATIONmoderate -0.05979 0.28712 -0.208 0.836

(Dispersion parameter for quasibinomial family taken to be 0.1891681)

Null deviance: 24.442 on 100 degrees of freedom

Residual deviance: 18.780 on 90 degrees of freedom

AIC: NA

Number of Fisher Scoring iterations: 4

>

> # find best model

>

> drop1(GLM_pre_B4ii, test = "F")

Single term deletions

Model:

extinction ~ fMOTILITY + fTIERING + fFEEDING + fCALCIFICATION

Df Deviance F value Pr(>F)

<none> 18.780

fMOTILITY 1 18.816 0.1738 0.6777

fTIERING 2 19.212 1.0348 0.3595

fFEEDING 5 19.953 1.1242 0.3533

fCALCIFICATION 2 19.003 0.5347 0.5877

>

**Jurassic background**

**Model = all**

> GLM_post_A1ii <- glm(extinction ~ fMOTILITY + fTIERING + fFEEDING +

+ fLATITUDE + fBASIN + fENVIRONMENT +

+ fCALCIFICATION,

+ family = quasibinomial, data = post)

> summary(GLM_post_A1ii)

Call:

glm(formula = extinction ~ fMOTILITY + fTIERING + fFEEDING +

fLATITUDE + fBASIN + fENVIRONMENT + fCALCIFICATION, family = quasibinomial,

data = post)

Deviance Residuals:

Min 1Q Median 3Q Max

-1.51234 -0.21406 0.08584 0.31578 0.87603

Coefficients:

Estimate Std. Error t value Pr(>|t|)

(Intercept) 0.04533 1.14542 0.040 0.9686

fMOTILITYnonmotile 0.44139 0.48417 0.912 0.3668

fTIERINGinfaunal 0.09458 0.44038 0.215 0.8309

fTIERINGpelagic 1.93865 0.90292 2.147 0.0372 *

fFEEDINGgrazing -0.13636 0.94827 -0.144 0.8863

fFEEDINGphotosymbiotic -1.08787 1.29808 -0.838 0.4064

fFEEDINGpredatory -0.07292 0.99946 -0.073 0.9422

fFEEDINGsuspension -0.81351 0.88483 -0.919 0.3628

fLATITUDET -0.61547 0.42484 -1.449 0.1544

fBASINTethys 1.08666 0.50557 2.149 0.0370 *

fENVIRONMENTOffshore -1.20987 0.45935 -2.634 0.0115 *

fENVIRONMENTReef -1.66180 1.39474 -1.191 0.2397

fCALCIFICATIONmoderate 0.15080 0.53518 0.282 0.7794

---

Signif. codes: 0 ‘***’ 0.001 ‘**’ 0.01 ‘*’ 0.05 ‘.’ 0.1 ‘ ’ 1

(Dispersion parameter for quasibinomial family taken to be 0.2844998)

Null deviance: 23.615 on 57 degrees of freedom

Residual deviance: 15.391 on 45 degrees of freedom

AIC: NA

Number of Fisher Scoring iterations: 4

> # find best model

>

> drop1(GLM_post_A1ii, test = "F")

Single term deletions

Model:

extinction ~ fMOTILITY + fTIERING + fFEEDING + fLATITUDE + fBASIN +

fENVIRONMENT + fCALCIFICATION

Df Deviance F value Pr(>F)

<none> 15.391

fMOTILITY 1 15.629 0.6965 0.40836

fTIERING 2 16.803 2.0641 0.13878

fFEEDING 4 15.811 0.3069 0.87182

fLATITUDE 1 15.991 1.7543 0.19203

fBASIN 1 16.748 3.9680 0.05246 .

fENVIRONMENT 2 18.316 4.2762 0.01994 *

fCALCIFICATION 1 15.414 0.0661 0.79830

---

Signif. codes: 0 ‘***’ 0.001 ‘**’ 0.01 ‘*’ 0.05 ‘.’ 0.1 ‘ ’ 1

>

> # best model

> GLM_post_A1iii <- glm(extinction ~ fBASIN + fENVIRONMENT,

+ family = quasibinomial, data = post)

>

> summary(GLM_post_A1iii)

Call:

glm(formula = extinction ~ fBASIN + fENVIRONMENT, family = quasibinomial,

data = post)

Deviance Residuals:

Min 1Q Median 3Q Max

-1.39697 -0.23517 0.01493 0.36667 1.15096

Coefficients:

Estimate Std. Error t value Pr(>|t|)

(Intercept) -0.7316 0.3532 -2.072 0.04309 *

fBASINTethys 1.2343 0.4345 2.841 0.00633 **

fENVIRONMENTOffshore -0.4401 0.3350 -1.314 0.19450

fENVIRONMENTReef -2.2945 1.1370 -2.018 0.04856 *

---

Signif. codes: 0 ‘***’ 0.001 ‘**’ 0.01 ‘*’ 0.05 ‘.’ 0.1 ‘ ’ 1

(Dispersion parameter for quasibinomial family taken to be 0.3009023)

Null deviance: 23.615 on 57 degrees of freedom

Residual deviance: 19.858 on 54 degrees of freedom

AIC: NA

Number of Fisher Scoring iterations: 4

**Model = all no env**

> GLM_post_B1ii <- glm(extinction ~ fMOTILITY + fTIERING + fFEEDING +

+ fLATITUDE + fBASIN + fCALCIFICATION,

+ family = quasibinomial, data = post)

> summary(GLM_post_B1ii)

Call:

glm(formula = extinction ~ fMOTILITY + fTIERING + fFEEDING +

fLATITUDE + fBASIN + fCALCIFICATION, family = quasibinomial,

data = post)

Deviance Residuals:

Min 1Q Median 3Q Max

-1.17245 -0.30500 0.02441 0.33190 0.97939

Coefficients:

Estimate Std. Error t value Pr(>|t|)

(Intercept) -0.652952 0.840734 -0.777 0.4392

fMOTILITYnonmotile 0.022546 0.265609 0.085 0.9325

fTIERINGinfaunal 0.013179 0.276256 0.048 0.9620

fTIERINGpelagic 0.953836 0.574465 1.660 0.1000 .

fFEEDINGgrazing 1.153372 0.628432 1.835 0.0694 .

fFEEDINGother 1.335053 1.178406 1.133 0.2600

fFEEDINGphotosymbiotic 0.625865 0.691337 0.905 0.3675

fFEEDINGpredatory 1.241876 0.690106 1.800 0.0749 .

fFEEDINGsuspension 0.264316 0.497767 0.531 0.5966

fLATITUDEP 0.180565 0.518066 0.349 0.7282

fLATITUDET -0.004722 0.228922 -0.021 0.9836

fBASINPanthalassa -0.462281 0.516853 -0.894 0.3732

fBASINTethys -0.002421 0.539806 -0.004 0.9964

fCALCIFICATIONlight -0.577693 0.674157 -0.857 0.3935

fCALCIFICATIONmoderate 0.005010 0.354818 0.014 0.9888

---

Signif. codes: 0 ‘***’ 0.001 ‘**’ 0.01 ‘*’ 0.05 ‘.’ 0.1 ‘ ’ 1

(Dispersion parameter for quasibinomial family taken to be 0.251139)

Null deviance: 42.295 on 114 degrees of freedom

Residual deviance: 30.418 on 100 degrees of freedom

AIC: NA

Number of Fisher Scoring iterations: 4

>

> # find best model

>

> drop1(GLM_post_B1ii, test = "F")

Single term deletions

Model:

extinction ~ fMOTILITY + fTIERING + fFEEDING + fLATITUDE + fBASIN +

fCALCIFICATION

Df Deviance F value Pr(>F)

<none> 30.418

fMOTILITY 1 30.420 0.0059 0.9387

fTIERING 2 31.094 1.1106 0.3334

fFEEDING 5 32.449 1.3355 0.2555

fLATITUDE 2 30.449 0.0512 0.9501

fBASIN 2 31.475 1.7371 0.1813

fCALCIFICATION 2 30.660 0.3979 0.6728

>

**Model = extrinsic**

> GLM_post_A3ii <- glm(extinction ~ fLATITUDE + fBASIN + fENVIRONMENT,

+ family = quasibinomial, data = post)

> summary(GLM_post_A3ii)

Call:

glm(formula = extinction ~ fLATITUDE + fBASIN + fENVIRONMENT,

family = quasibinomial, data = post)

Deviance Residuals:

Min 1Q Median 3Q Max

-1.42597 -0.23507 0.02656 0.37338 1.14446

Coefficients:

Estimate Std. Error t value Pr(>|t|)

(Intercept) -0.6267 0.4674 -1.341 0.1857

fLATITUDET -0.1288 0.3728 -0.345 0.7312

fBASINTethys 1.1943 0.4527 2.638 0.0109 *

fENVIRONMENTOffshore -0.4896 0.3676 -1.332 0.1886

fENVIRONMENTReef -2.2306 1.1610 -1.921 0.0601 .

---

Signif. codes: 0 ‘***’ 0.001 ‘**’ 0.01 ‘*’ 0.05 ‘.’ 0.1 ‘ ’ 1

(Dispersion parameter for quasibinomial family taken to be 0.3059362)

Null deviance: 23.615 on 57 degrees of freedom

Residual deviance: 19.822 on 53 degrees of freedom

AIC: NA

Number of Fisher Scoring iterations: 4

>

> # find best model

>

> drop1(GLM_post_A3ii, test = "F")

Single term deletions

Model:

extinction ~ fLATITUDE + fBASIN + fENVIRONMENT

Df Deviance F value Pr(>F)

<none> 19.822

fLATITUDE 1 19.858 0.0975 0.75609

fBASIN 1 22.058 5.9786 0.01784 *

fENVIRONMENT 2 21.794 2.6368 0.08096 .

---

Signif. codes: 0 ‘***’ 0.001 ‘**’ 0.01 ‘*’ 0.05 ‘.’ 0.1 ‘ ’ 1

>

> # best model

> GLM_post_A3iii <- glm(extinction ~ fBASIN,

+ family = quasibinomial, data = post)

>

> summary(GLM_post_A3iii)

Call:

glm(formula = extinction ~ fBASIN, family = quasibinomial, data = post)

Deviance Residuals:

Min 1Q Median 3Q Max

-1.25583 -0.36205 0.04317 0.45311 1.10095

Coefficients:

Estimate Std. Error t value Pr(>|t|)

(Intercept) -0.7316 0.3614 -2.024 0.0477 *

fBASINTethys 0.9141 0.3971 2.302 0.0251 *

---

Signif. codes: 0 ‘***’ 0.001 ‘**’ 0.01 ‘*’ 0.05 ‘.’ 0.1 ‘ ’ 1

(Dispersion parameter for quasibinomial family taken to be 0.3151467)

Null deviance: 23.615 on 57 degrees of freedom

Residual deviance: 21.850 on 56 degrees of freedom

AIC: NA

Number of Fisher Scoring iterations: 3

**Model = extrinsic no env**

> GLM_post_B3ii <- glm(extinction ~ fLATITUDE + fBASIN,

+ family = quasibinomial, data = post)

> summary(GLM_post_B3ii)

Call:

glm(formula = extinction ~ fLATITUDE + fBASIN, family = quasibinomial,

data = post)

Deviance Residuals:

Min 1Q Median 3Q Max

-1.18921 -0.41443 0.07206 0.36821 1.23843

Coefficients:

Estimate Std. Error t value Pr(>|t|)

(Intercept) -0.15073 0.50156 -0.301 0.764

fLATITUDEP 0.09206 0.51178 0.180 0.858

fLATITUDET 0.04691 0.22530 0.208 0.835

fBASINPanthalassa -0.35305 0.50998 -0.692 0.490

fBASINTethys 0.13156 0.51975 0.253 0.801

(Dispersion parameter for quasibinomial family taken to be 0.3064222)

Null deviance: 42.295 on 114 degrees of freedom

Residual deviance: 40.896 on 110 degrees of freedom

AIC: NA

Number of Fisher Scoring iterations: 3

>

> # find best model

>

> drop1(GLM_post_B3ii, test = "F")

Single term deletions

Model:

extinction ~ fLATITUDE + fBASIN

Df Deviance F value Pr(>F)

<none> 40.896

fLATITUDE 2 40.917 0.0279 0.9725

fBASIN 2 42.294 1.8799 0.1575

>

**Model = intrinsic**

> GLM_post_A4ii <- glm(extinction ~ fMOTILITY + fTIERING + fFEEDING +

+ fCALCIFICATION,

+ family = quasibinomial, data = post)

> summary(GLM_post_A4ii)

Call:

glm(formula = extinction ~ fMOTILITY + fTIERING + fFEEDING +

fCALCIFICATION, family = quasibinomial, data = post)

Deviance Residuals:

Min 1Q Median 3Q Max

-1.23841 -0.35885 0.07215 0.42268 1.11761

Coefficients:

Estimate Std. Error t value Pr(>|t|)

(Intercept) 0.48986 0.93482 0.524 0.6026

fMOTILITYnonmotile 0.02496 0.46913 0.053 0.9578

fTIERINGinfaunal -0.16568 0.44754 -0.370 0.7128

fTIERINGpelagic 1.77230 0.92260 1.921 0.0606 .

fFEEDINGgrazing -0.15181 0.97205 -0.156 0.8765

fFEEDINGphotosymbiotic -1.00033 1.12559 -0.889 0.3785

fFEEDINGpredatory -0.20319 1.05564 -0.192 0.8482

fFEEDINGsuspension -0.37252 0.87741 -0.425 0.6730

fCALCIFICATIONmoderate -0.28667 0.51093 -0.561 0.5773

---

Signif. codes: 0 ‘***’ 0.001 ‘**’ 0.01 ‘*’ 0.05 ‘.’ 0.1 ‘ ’ 1

(Dispersion parameter for quasibinomial family taken to be 0.3181259)

Null deviance: 23.615 on 57 degrees of freedom

Residual deviance: 19.476 on 49 degrees of freedom

AIC: NA

Number of Fisher Scoring iterations: 4

>

> # find best model

>

> drop1(GLM_post_A4ii, test = "F")

Single term deletions

Model:

extinction ~ fMOTILITY + fTIERING + fFEEDING + fCALCIFICATION

Df Deviance F value Pr(>F)

<none> 19.476

fMOTILITY 1 19.477 0.0023 0.9622

fTIERING 2 20.768 1.6259 0.2072

fFEEDING 4 19.804 0.2067 0.9335

fCALCIFICATION 1 19.576 0.2526 0.6175

>

**Model = intrinsic no env**

> GLM_post_B4ii <- glm(extinction ~ fMOTILITY + fTIERING + fFEEDING +

+ fCALCIFICATION,

+ family = quasibinomial, data = post)

> summary(GLM_post_B4ii)

Call:

glm(formula = extinction ~ fMOTILITY + fTIERING + fFEEDING +

fCALCIFICATION, family = quasibinomial, data = post)

Deviance Residuals:

Min 1Q Median 3Q Max

-1.07893 -0.38812 0.07983 0.34490 1.05144

Coefficients:

Estimate Std. Error t value Pr(>|t|)

(Intercept) -0.617533 0.530221 -1.165 0.2468

fMOTILITYnonmotile -0.029025 0.255465 -0.114 0.9098

fTIERINGinfaunal -0.042630 0.264686 -0.161 0.8724

fTIERINGpelagic 0.810725 0.557628 1.454 0.1490

fFEEDINGgrazing 1.123169 0.615087 1.826 0.0707 .

fFEEDINGother 1.358299 1.150768 1.180 0.2406

fFEEDINGphotosymbiotic 0.410438 0.637146 0.644 0.5209

fFEEDINGpredatory 1.157417 0.682559 1.696 0.0929 .

fFEEDINGsuspension 0.123304 0.467416 0.264 0.7925

fCALCIFICATIONlight -0.452490 0.659257 -0.686 0.4940

fCALCIFICATIONmoderate -0.004989 0.332452 -0.015 0.9881

---

Signif. codes: 0 ‘***’ 0.001 ‘**’ 0.01 ‘*’ 0.05 ‘.’ 0.1 ‘ ’ 1

(Dispersion parameter for quasibinomial family taken to be 0.2494198)

Null deviance: 42.295 on 114 degrees of freedom

Residual deviance: 31.582 on 104 degrees of freedom

AIC: NA

Number of Fisher Scoring iterations: 4

>

> # find best model

>

> drop1(GLM_post_B4ii, test = "F")

Single term deletions

Model:

extinction ~ fMOTILITY + fTIERING + fFEEDING + fCALCIFICATION

Df Deviance F value Pr(>F)

<none> 31.582

fMOTILITY 1 31.585 0.0106 0.9182

fTIERING 2 32.103 0.8577 0.4271

fFEEDING 5 33.904 1.5293 0.1871

fCALCIFICATION 2 31.732 0.2482 0.7806

>
